# Supplementary material for: Neutrophil Extracellular Traps Promote a Liver Metastatic Phenotype in Human Colorectal Cancer Cells through Epithelial – Mesenchymal Transition
Source: Research Square preprint supplement (doi:10.21203/rs.3.rs-6216750/v1), 2025-04-03
Supplement: Supplementary file 1 [file fa90b7055735fa430d3a5e28.docx]

Table.1A

| Mouse gene | Primer sequence (5'-3') |
| --- | --- |
| ZEB1-F | AGTTGCTCACCTGCCCGTAT |
| ZEB1-R | CATGGCGGTACTCTTCTTGC |
| SNAIL1-F | CCGCAGGTGGCTGATGGAGT |
| SNAIL1-R | CTCGGTATCTTGATTTCGGTTGGGT |
| TWIST1-F | CCTCGGACAAGCTGAGCAAGA |
| TWIST1-R | GTACAGGCGCAGGGTGATCG |
| β-actin-F | GGACCTGACAGACTACCTCAT |
| β-actin-R | GCTCGAAGTCTAGAGCAACATAG |

Table.1B

| Human gene | Primer sequence (5'-3') |
| --- | --- |
| ZEB1-F | GGCTCCTATAGCTCACACATAAG |
| ZEB1-R | TGCTGAAAGAGACGGTGAAG |
| SNAIL1-F | AGCTCTCTGAGGCCAAGGAT |
| SNAIL1-R | TGGCTTCGGATGTGCATCTT |
| TWIST1-F | CCAGGTACATCGACTTCCTCTA |
| TWIST1-R | CCATCCTCCAGACCGAGAA |
| β-actin-F | TTCCTGGGCATGGAGTCCT |
| β-actin-R | AGGAGGAGCAATGATCTTGATC |
